# Supplementary material for: The Missing Tailed Phages: Prediction of Small Capsid Candidates
Source: Preprints.org preprint supplement (doi:10.20944/preprints202011.0024.v1), 2020-11-02
Supplement: Supplementary file 1 [file Data_File_4_isolated_genomes_predicted_small_capsids.xlsx]

## Sheet: T=3
	V1	V2
1	NC_001609	11624
2	NC_042564	14504
3	NC_002670	14510
4	NC_002515	11660
5	NC_016651	14270
6	NC_048862	11569

## Sheet: T=4
	V1	V2
1	NC_009643	17171
2	NC_048739	19679
3	NC_028692	15524
4	NC_048740	19428
5	NC_049961	21054
6	NC_049974	21781
7	NC_049960	21684
8	NC_049970	20083
9	NC_049976	18753
10	NC_001423	19366
11	NC_028789	18609
12	NC_049971	18466
13	NC_049972	18932
14	NC_049975	18379
15	NC_049965	19105
16	NC_004165	18630
17	NC_002649	21129
18	NC_049973	20784
19	NC_011048	19282
20	NC_048859	18899
21	NC_048858	18635
22	NC_048738	18212
23	NC_048661	19089
24	NC_048707	17961
25	NC_048629	16748
26	NC_019523	18919
27	NC_017980	18397
28	NC_018083	17972
29	NC_018084	18078
30	NC_048712	19046
31	NC_012419	21115
32	NC_015270	16945
33	NC_049937	18168
34	NC_049932	17966
35	NC_049933	18136
36	NC_049934	18737
37	NC_049939	18818
38	NC_049940	18415
39	NC_049938	17927
40	NC_049936	18286
41	NC_049935	18186
42	NC_028693	18655
43	NC_049931	18838
44	NC_049930	18742
45	NC_025467	17972
46	NC_030907	17562
47	NC_030935	17727
48	NC_030912	17119
49	NC_049449	18281
50	NC_031075	22240
51	NC_031002	21697
52	NC_031044	22179
53	NC_024149	18899
54	NC_010363	18762
55	NC_002669	14957
56	NC_002671	15179
57	NC_001629	22195
58	NC_001706	22172
59	NC_021317	21248
60	NC_007046	18199
61	NC_047813	18546
62	NC_031046	17641
63	NC_048159	17034
64	NC_023550	17869
65	NC_004679	18227
66	NC_047855	17602
67	NC_048107	17700
68	NC_016565	18168
69	NC_009875	17938
70	NC_047788	18023
71	NC_031008	17861
72	NC_047919	17603
73	NC_004678	16784
74	NC_042114	19741
75	NC_001825	19343
76	NC_004814	16687
77	NC_047814	18275
