# Supplementary material for: The Missing Tailed Phages: Prediction of Small Capsid Candidates
Source: Preprints.org preprint supplement (doi:10.20944/preprints202011.0024.v1), 2020-11-02
Supplement: Supplementary file 1 [file supplementary]

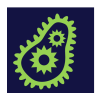

Supplementary Material

# The Missing Tailed Phages: Prediction of Small Capsid Candidates

Antoni Luque<sup>1,2,3,\*</sup>, Sean Benler<sup>4</sup>, Diana Lee<sup>1,2</sup>, Colin Brown<sup>1,5</sup>, and Simon White<sup>6</sup>

<sup>1</sup> Viral Information Institute, San Diego State University, San Diego, CA, USA.

<sup>2</sup> Computational Science Research Center, San Diego State University, San Diego, USA.

<sup>3</sup> Department of Mathematics and Statistics, San Diego State University, San Diego, USA.

<sup>4</sup> National Center for Biotechnology Information (NCBI), Bethesda, MD, USA.

<sup>5</sup> Department of Physics, San Diego State University, San Diego, USA.

<sup>6</sup> Department of Molecular and Cell Biology, University of Connecticut, Storrs, CT, USA.

\* Correspondence: aluque@sdsu.edu.

Received: date; Accepted: date; Published: date

14 **Supplementary Figures and Tables**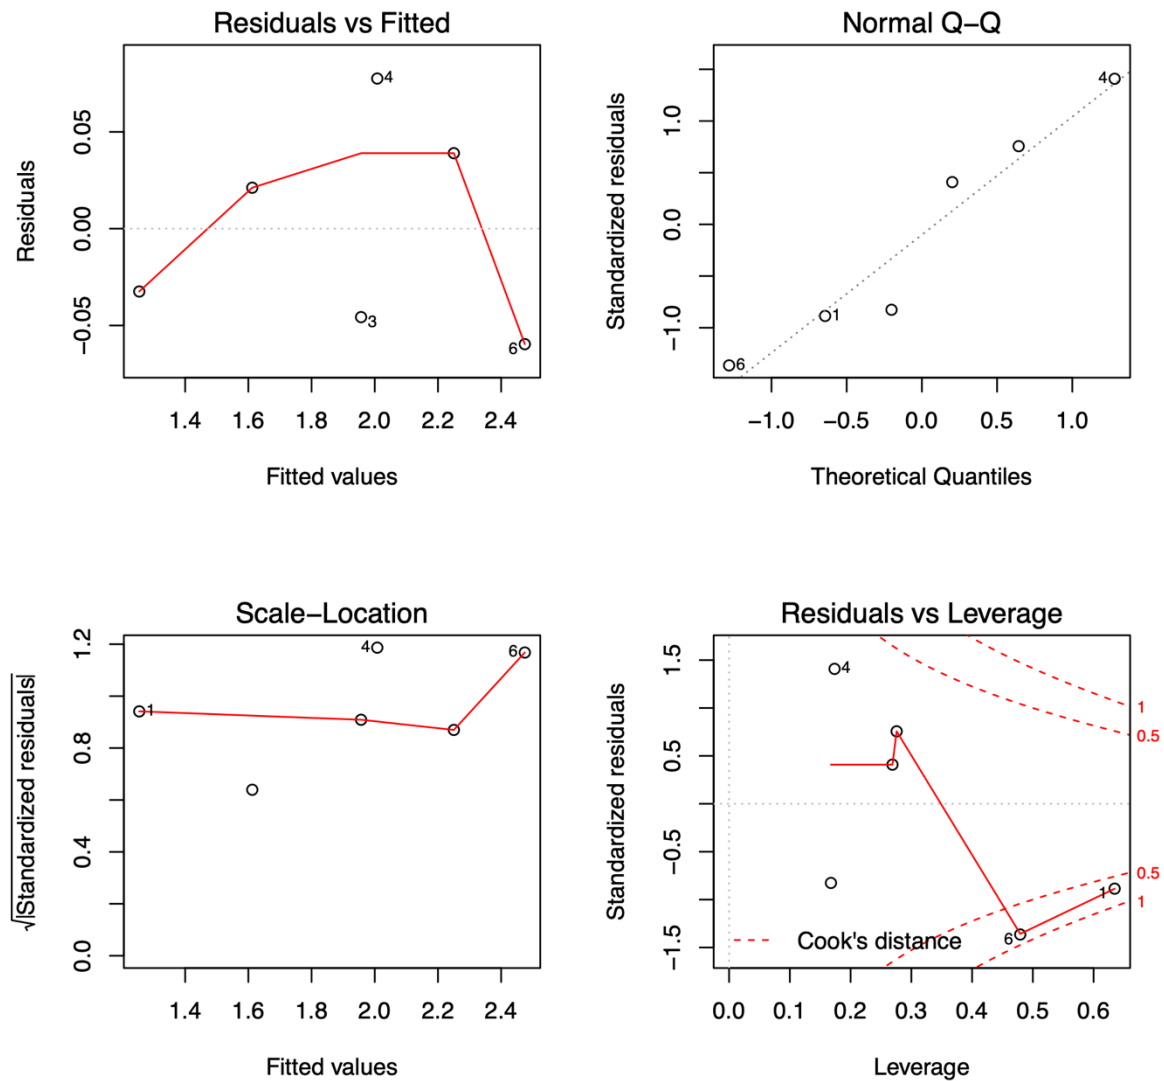

15  
16 **Figure S1.** Residual diagnostics for the genome length model.

17

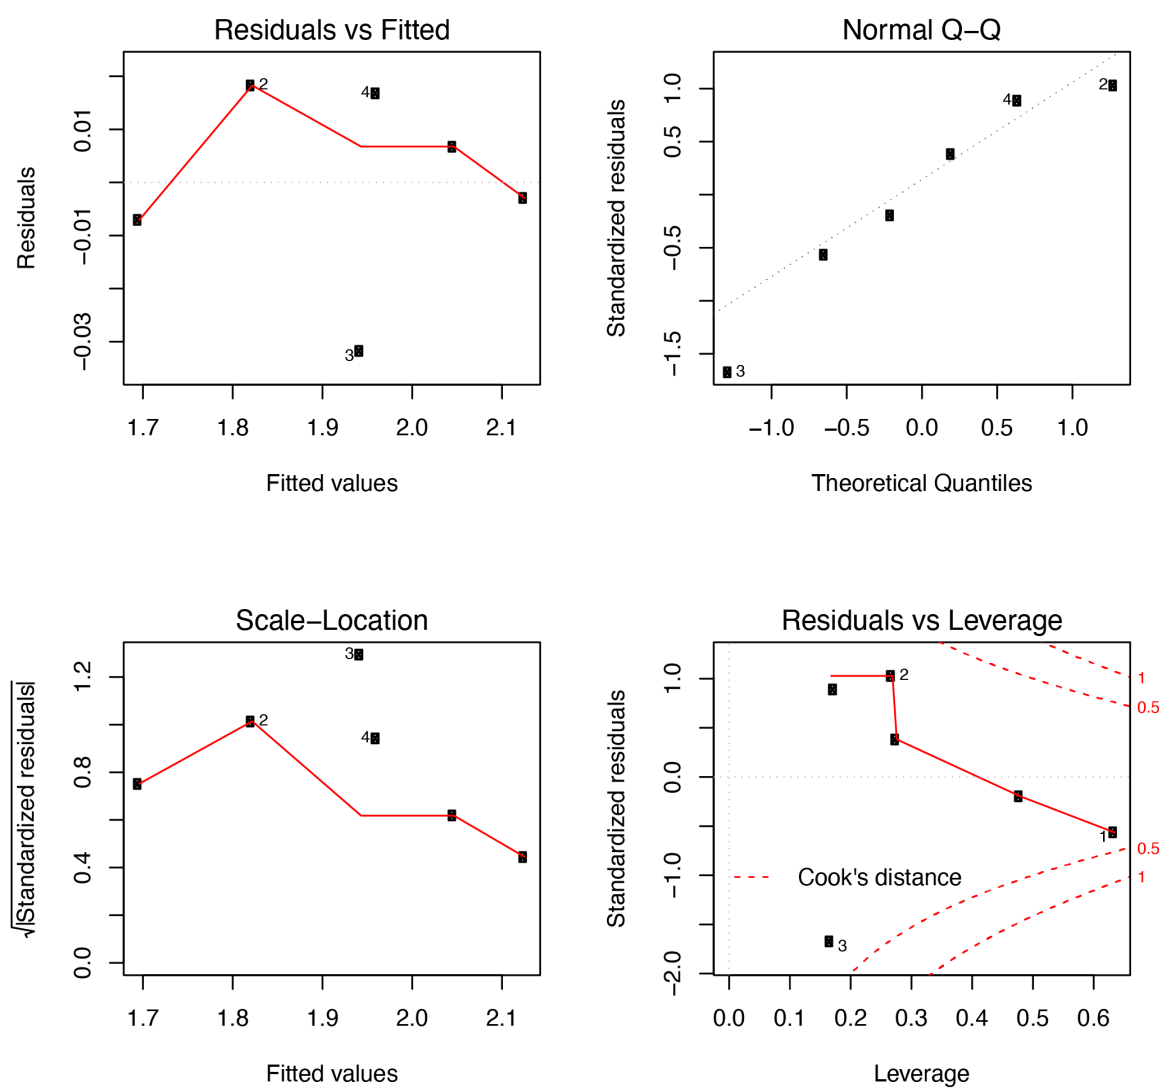

18

19 **Figure S2.** Residual diagnostics for the capsid diameter model.

20

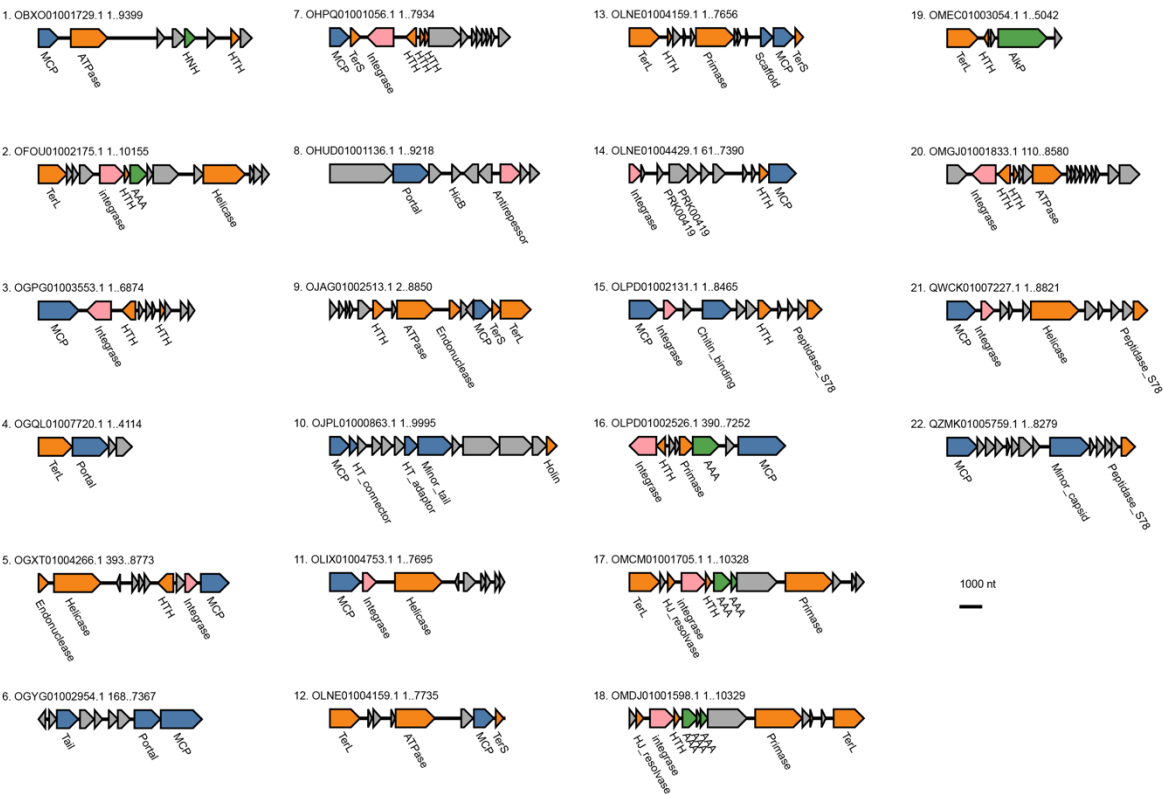

Figure S3. Annotated metagenome-assembled phage genomes for predicted T ≤ 3 capsid architectures.

| Property                       | rho    | p-value                  |
|--------------------------------|--------|--------------------------|
| Interior volume                | 0.924  | $4.09 \cdot 10^{-6}$ *** |
| Interior surface               | 0.923  | $4.08 \cdot 10^{-6}$ *** |
| Exterior surface               | 0.989  | $2.84 \cdot 10^{-6}$ *** |
| Genome size                    | 0.817  | $3.37 \cdot 10^{-6}$ *** |
| Capsids thickness              | 0.663  | 0.0010 **                |
| Interior sphericity            | −0.566 | 0.0069 **                |
| Exterior sphericity            | −0.684 | 0.0006 ***               |
| Genome density                 | −0.162 | 0.4695                   |
| MCP interior area <sup>§</sup> | 0.484  | 0.0242 *                 |
| MCP exterior area <sup>§</sup> | 0.380  | 0.0819                   |

**Table S1.** Correlation analysis with capsid size. Spearman's correlation coefficient (rho) for structural properties as a function of the external capsid diameter. The stars in the p-value are associated to standard cut-offs for statistical significance: (\*)  $p < 0.05$ , (\*\*)  $p < 0.01$ , and (\*\*\*)  $p < 0.001$ .
