# Supplementary material for: The Missing Tailed Phages: Prediction of Small Capsid Candidates
Source: Preprints.org preprint supplement (doi:10.20944/preprints202011.0024.v1), 2020-11-02
Supplement: Supplementary file 3 [file Data_File_5_metagenome-assembled_genomes_predicted_small_capsids.xlsx]

## Sheet: T=1.33
	V1	V2
1	OGQL01007720.1	4491
2	OMEC01003054.1	5389

## Sheet: T=2.33
	V1	V2
1	OLPD01002526.1	7252
2	OGYG01002954.1	7367
3	OGPG01003553.1	7385
4	OLNE01004429.1	7390
5	OLIX01004753.1	7718
6	OLNE01004159.1	7736
7	OHPQ01001056.1	7936
8	QZMK01005759.1	8285
9	OLPD01002131.1	8483

## Sheet: T=2.49
	V1	V2
1	OFOU01002175.1	10157
2	OJPL01000863.1	10252
3	OMCM01001705.1	10329
4	OMDJ01001598.1	10329
5	OMGJ01001833.1	8580
6	OGXT01004266.1	8773
7	QWCK01007227.1	8826
8	OJAG01002513.1	8850
9	OHUD01001136.1	9366
10	OBXO01001729.1	9419

## Sheet: T=3
	V1	V2
1	OFMM01001561.1	10552
2	OLSK01002610.1	11107
3	OJUG01004427.1	11370
4	OJSD01003900.1	11370
5	OJSE01004261.1	11370
6	OJSQ01003446.1	11370
7	OJSC01003166.1	11392
8	OHBD01001220.1	11685
9	OIWK01003212.1	11702
10	OMCT01001838.1	11805
11	OMEP01000207.1	11805
12	OKRU01003732.1	11859
13	OMBP01001148.1	12039
14	OMEV01001136.1	12062
15	OODL01002373.1	12064
16	OHOP01000746.1	12103
17	OFMG01001868.1	12444
18	OLSB01003115.1	12487
19	OGOG01003274.1	12490
20	OIWT01004010.1	12566
21	PPYF01671517.1	12627
22	OIWV01002656.1	12676
23	OLQD01002637.1	12790
24	OGWU01001573.1	12833
25	PPYE01644069.1	12888
26	OLPZ01001886.1	13001
27	OKVZ01000442.1	13076
28	OHJY01000637.1	13095
29	OGRU01002163.1	13244
30	OLOV01002225.1	13508
31	OJVW01000116.1	13524
32	OGCO01004939.1	13587
33	OOCI01001997.1	13610
34	OLOA01003204.1	13633
35	OLPD01001221.1	13770
36	QWCB01002870.1	13783
37	OLOK01002327.1	13788
38	OGUO01001785.1	13826
39	OFSD01001924.1	13998
40	OLOQ01002673.1	14096
41	OLPO01001767.1	14097
42	OLOS01002130.1	14224
43	OLNF01002498.1	14368

## Sheet: T=4
	V1	V2
1	OHRF01000569.1	15819
2	OHEF01000559.1	15819
3	OHGQ01000545.1	15819
4	OOJA01000096.1	16068
5	OHTK01000604.1	16139
6	OIFO01000134.1	16154
7	OLWH01000622.1	16297
8	OHNX01000523.1	16323
9	OHQX01000545.1	16323
10	OMED01000673.1	16357
11	OGWR01001812.1	16562
12	OAWD01000839.1	16575
13	OHZL01000400.1	16636
14	OIAY01000331.1	16636
15	OGWT01001635.1	16671
16	OMGH01001222.1	16719
17	OHFH01000359.1	16726
18	OGXS01001325.1	16899
19	OHLV01000408.1	16923
20	OIET01000963.1	17178
21	OGWU01000986.1	17534
22	OLNQ01002138.1	17703
23	ONZS01001047.1	17997
24	OMCM01000847.1	18034
25	OAWF01000598.1	18208
26	OHRS01000586.1	18417
27	OHCX01000347.1	18807
28	OHNK01000727.1	18808
29	OFMH01000864.1	18922
30	OBJG01001371.1	19059
31	OLXI01000695.1	19122
32	OIYG01001298.1	19351
33	OIGZ01000001.1	19946
34	OLOP01000967.1	20380
35	OQWM01000827.1	20700
36	OHKV01000518.1	21882
37	OHEV01000503.1	22025
38	OGTL01001335.1	22114
39	OLHG01000735.1	22442
40	OLHG01000733.1	22527
41	OJNZ01000692.1	22557
