# Supplementary material for: The Missing Tailed Phages: Prediction of Small Capsid Candidates
Source: Preprints.org preprint supplement (doi:10.20944/preprints202011.0024.v1), 2020-11-02
Supplement: Supplementary file 5 [file Luque_etal_prediction_small_tailed_phages_SM_2020_10_29.docx]

**Supplementary Material**

The Missing Tailed Phages: Prediction of Small Capsid Candidates

Antoni Luque1,2,3,*, Sean Benler4, Diana Lee 1,2, Colin Brown1,5, and Simon White6

1 Viral Information Institute, San Diego State University, San Diego, CA, USA.

2 Computational Science Research Center, San Diego State University, San Diego, USA.

3 Department of Mathematics and Statistics, San Diego State University, San Diego, USA.

4 National Center for Biotechnology Information (NCBI), Bethesda, MD, USA.

5 Department of Physics, San Diego State University, San Diego, USA.

6 Department of Molecular and Cell Biology, University of Connecticut, Storrs, CT, USA.

***** Correspondence: aluque@sdsu.edu.

Received: date; Accepted: date; Published: date

**Supplementary Figures and Tables**

**
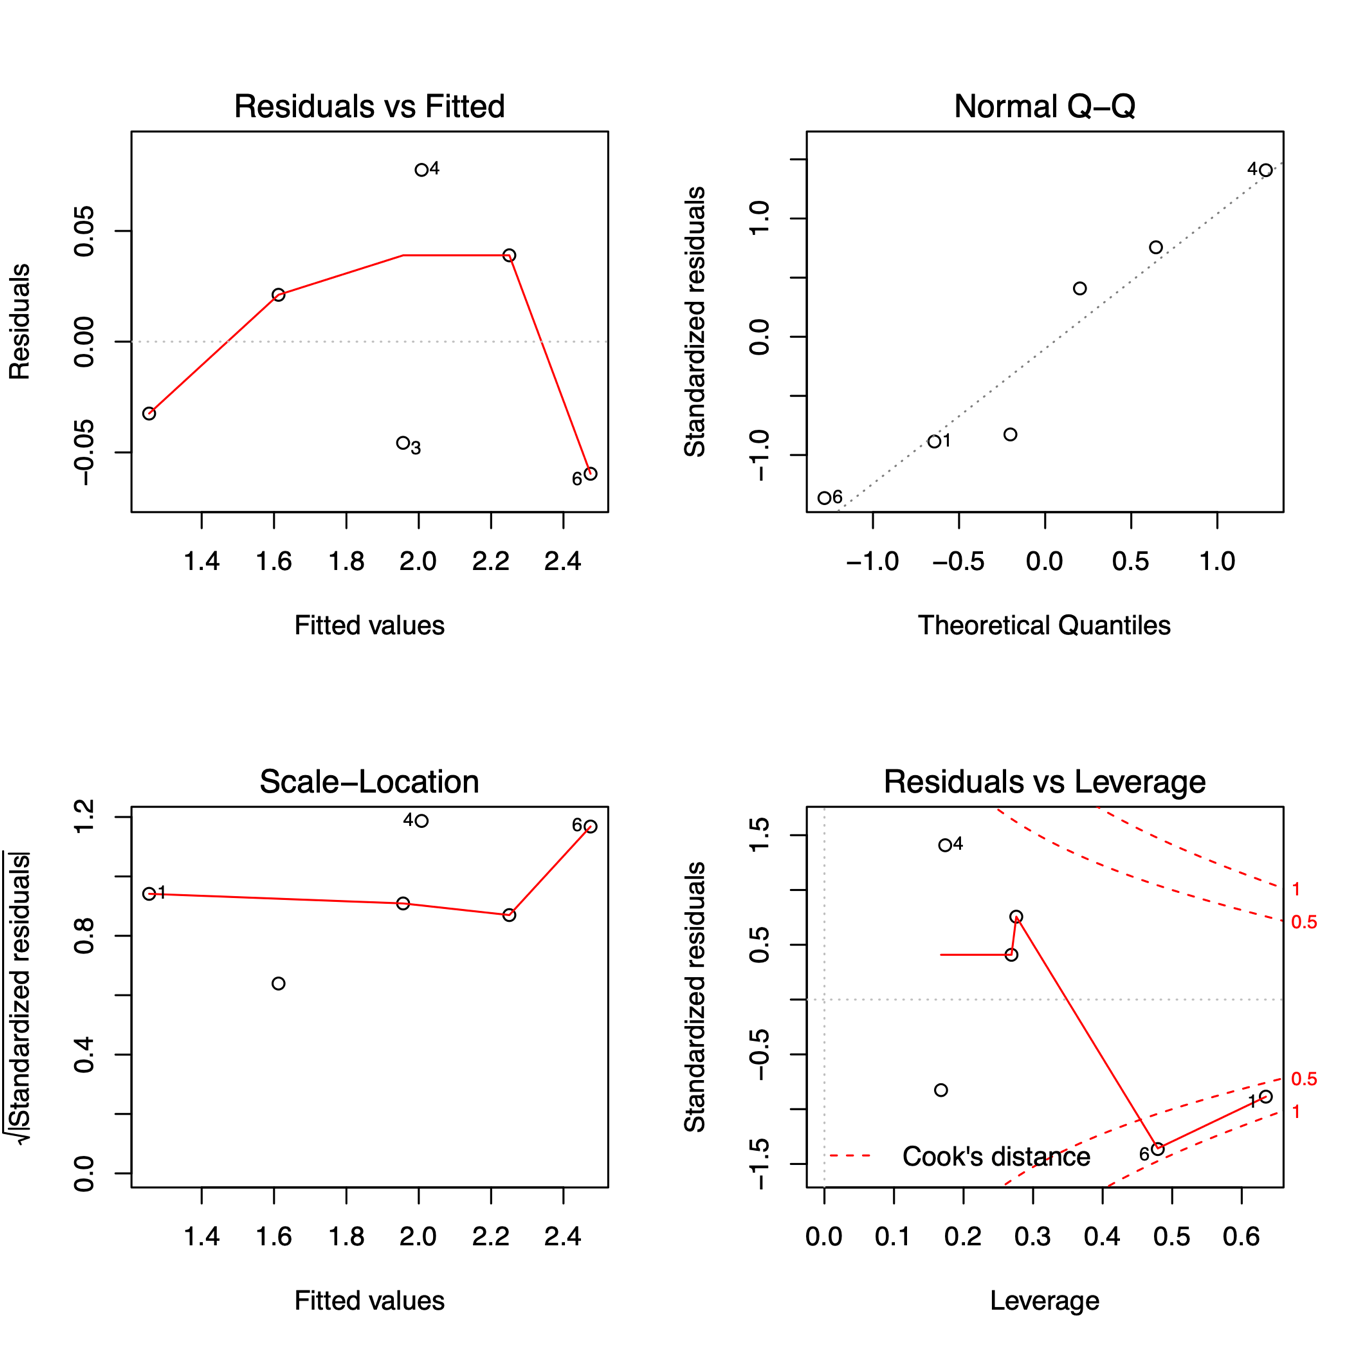
**

**Figure S1.** Residual diagnostics for the genome length model.

**
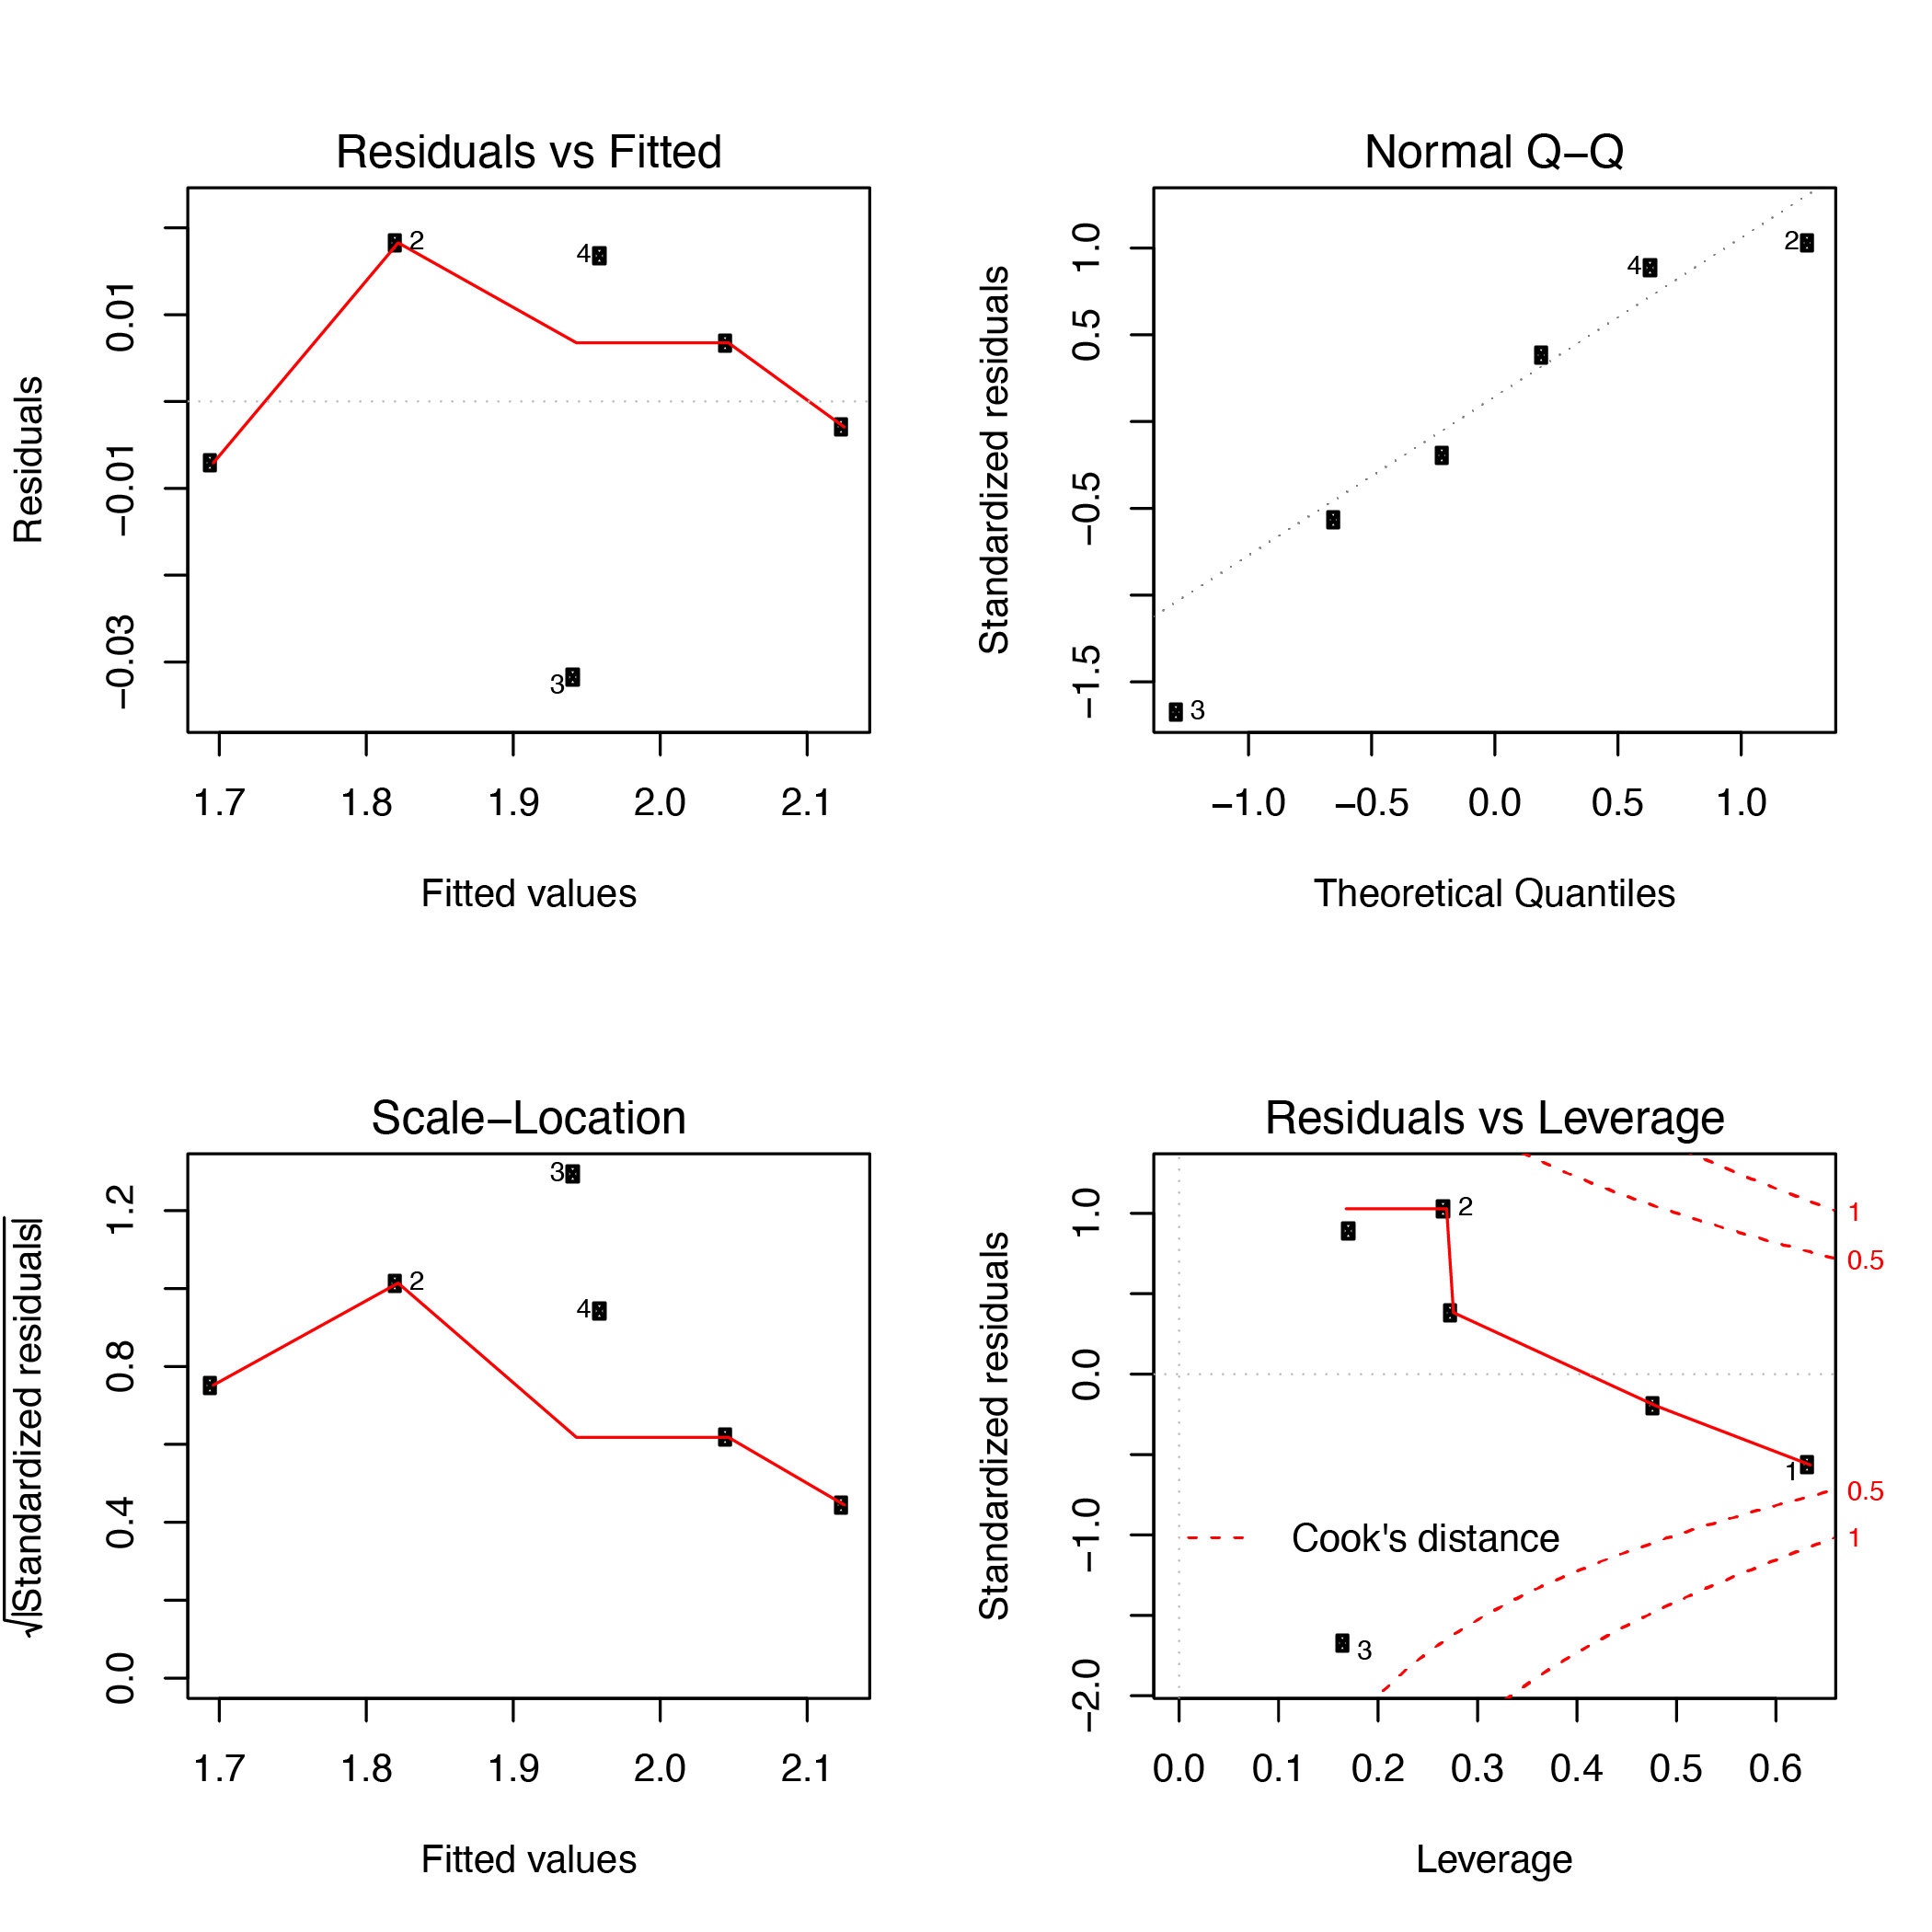
**

**Figure S2.** Residual diagnostics for the capsid diameter model.


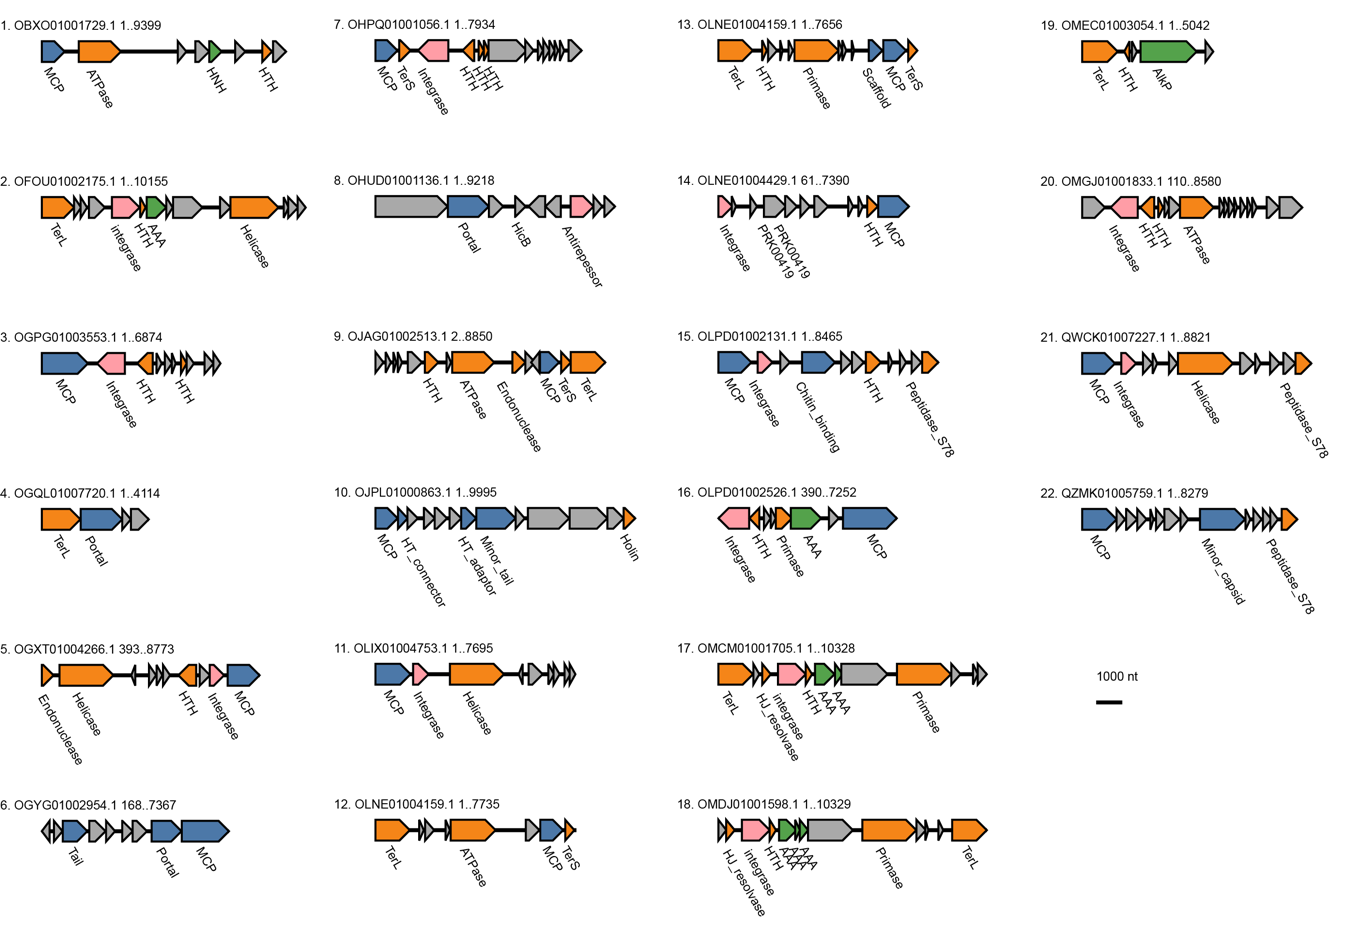
**Figure S3.** Annotated metagenome-assembled tailed phage genomes for predicted T ≤ 3 capsid architectures.

| **Property** | **rho** | **p-value** |
| --- | --- | --- |
| Interior volume | 0.924 | 4.09·10–6 *** |
| Interior surface | 0.923 | 4.08·10–6 *** |
| Exterior surface | 0.989 | 2.84·10–6 *** |
| Genome size | 0.817 | 3.37·10–6 *** |
| Capsids thickness | 0.663 | 0.0010 ** |
| Interior sphericity | –0.566 | 0.0069 ** |
| Exterior sphericity | –0.684 | 0.0006 *** |
| Genome density | –0.162 | 0.4695 |
| MCP interior area§ | 0.484 | 0.0242 * |
| MCP exterior area§ | 0.380 | 0.0819 |

**Table S1.** Correlation analysis with capsid size. Spearman’s correlation coefficient (rho) for structural properties as a function of the external capsid diameter. The stars in the p-value are associated to standard cut-offs for statistical significance: (*) p < 0.05, (**) p < 0.01, and (***) p < 0.001.
